# Supplementary material for: The Impact of Practicing Open- vs. Closed-Skill Sports on Executive Functions—A Meta-Analytic and Systematic Review with a Focus on Characteristics of Sports
Source: MDPI journal article supplement (doi:10.3390/brainsci12081071), 2022-08-12
Supplement: s1 [file s1]

**Table S1.**

*Characteristics of the cross-sectional studies eligible for qualitative and quantitative analysis (alphabetical order)*

| Study (Author, Year)         | Sample Size<br>Total<br>OSE<br>CSE<br>Control<br>(Female/male) | Sample Years<br>OSE<br>CSE,<br>Control<br>(M/SD)<br><br>(Age Category) | Age in | EFs    | EF-measure                                   | OSE                                                    | CSE                                    | Level of performance / Experience                                                                              | Outcome<br>Regarding the difference between OSE vs. CSE                                                                                                                                                                                              |
|------------------------------|----------------------------------------------------------------|------------------------------------------------------------------------|--------|--------|----------------------------------------------|--------------------------------------------------------|----------------------------------------|----------------------------------------------------------------------------------------------------------------|------------------------------------------------------------------------------------------------------------------------------------------------------------------------------------------------------------------------------------------------------|
| <b>Ballester et al. [30]</b> | <i>N</i> = 66<br>22 (8/14)<br>22 (10/12)<br>22 (--/--)         | 24.6 (0.9)<br>22.5 (0.9)<br>22.3 (0.6)<br>(Adults)                     |        | IC     | Oddball Task                                 | Basketball, Football, Martial arts, Tennis, Volleyball | Athletics, Cycling, Swimming Triathlon | No differences in years of training ( $p = .285$ ) but in hours per week ( $p = .019$ , $d = .75$ , OSE < CSE) | - Sig. effect of type of sport on inhibition control (OSE > CSE)                                                                                                                                                                                     |
| <b>Chang et al. [37]</b>     | <i>N</i> = 60<br>20 (5/15)<br>20 (6/14)<br>20 (7/13)           | 21.15 (1.2)<br>21.20 (1.8)<br>21.60 (1.4)<br>(Adults)                  |        | IC, CF | Stroop Task, WCST                            | Wushu training                                         | Marathon running                       | No differences in training hours and training years between OSE and CSE, national level                        | - No sig. effects between groups in Stroop or WCST performance (OSE > CSE)                                                                                                                                                                           |
| <b>Chen et al. [53]</b>      | <i>N</i> = 60<br>23 (4/19)<br>24 (15/9)<br>23 (11/12)          | 57.17 (3.2)<br>59.08 (7.2)<br>58.91 (4.8)<br>(Adults)                  |        | WM     | Spatial Working Memory Task                  | Badminton, Basketball, Table tennis, Tennis            | Cycling, Running, Swimming             | Sig. difference in IPAQ ( $F[2,67] = 8.30$ , $p < .001$ , mean IPAQ scores: CSE > OSE > control)               | - Sig. main effects of group ( $F[2,67] = 5.73$ , $p < .01$ , $\eta_p^2 = 0.15$ ) for accuracy but no difference between OSE and CSE ( $ps < .05$ )<br>- No sig. main effects for RT for group ( $F[2,67] = 0.69$ , $p > 0.05$ , $\eta_p^2 = 0.02$ ) |
| <b>Chueh et al. [38]</b>     | <i>N</i> = 48<br>16 (7/9)<br>16 (7/9)<br>16 (7/9)              | 20.00 (1.2)<br>21.10 (2.3)<br>20.70 (1.1)<br>(Adults)                  |        | WM     | Non-delayed and delayed match-to-sample task | Badminton, Table tennis                                | Running, Swimming, Triathlon           | Differences in years of training between OSE ( $10.8 \pm 2.2$ ) and CSE ( $9.7 \pm 3.2$ )                      | - No main effects of group for accuracy results ( $F[2,45] = 0.025$ , $p = .096$ )<br>- Sig. effects of group for RT results ( $F[2,45] = 5.11$ , $p < .05$ , $\eta^2 = .185$ ) but no                                                               |

|                             |                                                          |                                                             |        |                                                                                                           |                                                 |                               |                                                                                                                 |                                                                                                                                                                                                                                                                                                                                                                                                         |
|-----------------------------|----------------------------------------------------------|-------------------------------------------------------------|--------|-----------------------------------------------------------------------------------------------------------|-------------------------------------------------|-------------------------------|-----------------------------------------------------------------------------------------------------------------|---------------------------------------------------------------------------------------------------------------------------------------------------------------------------------------------------------------------------------------------------------------------------------------------------------------------------------------------------------------------------------------------------------|
|                             |                                                          |                                                             |        |                                                                                                           |                                                 |                               |                                                                                                                 | sig. effects between OSE and CSE groups (OSE: 632.52 ms; CSE 655.03 ms < Con: 736.66 ms)                                                                                                                                                                                                                                                                                                                |
| <b>Dai et al. [39]</b>      | <i>N</i> = 48<br>16 (7/9)<br>16 (10/6)<br>16 (14/2)      | 69.00 (3.6)<br>69.90 (3.6)<br>67.30 (3.0)<br>(Older Adults) | CF     | Task-switching paradigm                                                                                   | Table tennis, Tennis                            | Running, Swimming             | Differences in years of training between OSE (13.0 ± 5.7) and CSE (11.1 ± 5.4)                                  | - Sig. differences for RT compared with control group ( <i>ts</i> (30) > 2.46, <i>p</i> < .02) for homogeneous condition, no sig. differences between OSE and CSE<br>- Sig. main effect for exercise mode for global switch costs ( <i>F</i> [2,45] = 3.52, <i>p</i> = .03, $\eta^2$ = .14) with differences between OSE and CSE but not for local switch cost ( <i>F</i> [2,45] = .20, <i>p</i> = .82) |
| <b>DeWaelle et al. [51]</b> | <i>N</i> = 170<br>86 (86/--)<br>25 (25/--)<br>59 (59/--) | 10.20 (1.0)<br>10.30 (1.1)<br>10.40 (1.1)<br>(Children)     | IC, WM | Spatial Span Task, Token Search, Monkey Ladder, Double Trouble Task, Sustained Attention to Response Task | Basketball, Hockey, Korfbal, Soccer, Volleyball | Athletics, Cycling, Swimming, | At least 2 h/week, no differences between OSE and CSE                                                           | - Sig. main effect for group ( <i>F</i> [2,166] = 5.143, <i>p</i> = .007, $\eta_p^2$ = .058) with superior executive functions of OSE compared with CSE and control group                                                                                                                                                                                                                               |
| <b>Gökce et al. [55]</b>    | <i>N</i> = 54<br>18 (9/9)<br>18 (9/9)<br>18 (11/7)       | 20.44 (1.9)<br>21.00 (2.0)<br>22.33 (1.9)<br>(Adults)       | WM     | Corsi's Block Tapping Test                                                                                | Fencing                                         | Swimming                      | No sig. differences in training history between OSE group (8.27 ± 2.13 years) and CSE group (8.22 ± 2.66 years) | - Sig. differences for right- and left-handed CBT, left hemispace accuracy was significantly different among the groups (right: <i>H</i> (2) = 15.336, <i>p</i> < .001, $\eta^2$ = .28; left: <i>H</i> (2) = 12.318, <i>p</i> = .002, $\eta^2$ = .23)<br>- OSE higher than CSE ( <i>p</i> = 0.034, <i>r</i> = -0.41) and controls ( <i>p</i> < .001, <i>r</i> = -0.65)                                  |

|                                    |                                                     |                                                           |                  |                                                                   |                                                        |                                           |                                                                                                                     |                                                                                                                                                                                                                                  |
|------------------------------------|-----------------------------------------------------|-----------------------------------------------------------|------------------|-------------------------------------------------------------------|--------------------------------------------------------|-------------------------------------------|---------------------------------------------------------------------------------------------------------------------|----------------------------------------------------------------------------------------------------------------------------------------------------------------------------------------------------------------------------------|
|                                    |                                                     |                                                           |                  |                                                                   |                                                        |                                           |                                                                                                                     | - Both OSE ( $p = .017$ , $r = -.46$ ) and CSE ( $p = .003$ , $r = -.53$ ) higher accuracy scores than controls                                                                                                                  |
| <b>Guo et al. [40]</b>             | $N = 111$<br>36 (19/17)<br>38 (23/15)<br>37 (21/16) | 67.6 (5.9)<br>66.7 (5.8)<br>66.9 (5.9)<br>(Older Adults)  | WM               | Visuospatial WM, short-term memory & mental rotation task         | Badminton<br>Table Tennis                              | Running,<br>Swimming                      | No differences in training hours and training years between OSE and CSE                                             | - Sig. effect of group on short-term memory task accuracy ( $F(2, 99) = 3.68$ , $p = .02$ ), but no differences between OSE and CSE<br>- No sig. differences in reaction time among the groups ( $F(2, 99) = 0.54$ , $p = .58$ ) |
| <b>Holfelder et al. [56]</b>       | $N = 86$<br>46 (23/23)<br>40 (20/20)                | 13.85 (0.7)<br>14.05 (0.8)<br>(Preadolescents)            | IC,<br>WM,<br>CF | Flanker Task, n-Back Task, Trail Making Task                      | Handball                                               | Athletics                                 | Amateur and elite athletes of OSE and CSE                                                                           | - No effect of type of sport on working memory, inhibitory control or cognitive flexibility<br>- specific Trail Walking Task sig. group effect ( $p < .01$ ; no standard EF-measure)                                             |
| <b>Huang et al. [41]</b>           | $N = 60$<br>20 (9/11)<br>20 (11/9)<br>20 (14/6)     | 69.4 (3.0)<br>70.55 (2.6)<br>68.3 (2.3)<br>(Older Adults) | IC               | Ericson Flanker Task                                              | Table Tennis,<br>Tennis,<br>Badminton                  | Running,<br>Swimming                      | Differences in participation regularity (OSE > CSE), exercise duration (OSE > CSE) and weekly frequency (OSE < CSE) | - Sig. effect of group on inhibition control ( $F(2, 57) = 3.33$ , $p = .043$ )<br>- OSE (441.94 ms) and CSE athletes (446.45 ms) exhibiting shorter RTs than controls (476.11 ms)                                               |
| <b>Jacobson &amp; Matteaus [8]</b> | $N = 54$<br>22 (8/14)<br>17 (14/3)<br>15 (9/6)      | 20.05 (1.2)<br>20.18 (1.5)<br>20.20 (1.3)<br>(Adults)     | IC               | D-KEFS Tower Test & Color-Word interference Test                  | Soccer,<br>Tennis                                      | Running,<br>Swimming                      | Differences between high-skilled and recreational Athletes                                                          | - Sig. effect of group on inhibition control ( $t(52) = 2.94$ , $p = .003$ , $r = .37$ ); OSE > CSE                                                                                                                              |
| <b>Koch &amp; Krenn [27]</b>       | $N = 75$<br>44(18/26)<br>31(12/19)<br>-             | 22.89 (4.2)<br>23.23 (4.7)<br>(Adults)                    | WM,<br>IC,<br>CF | Design Fluency Test, Trail Making Task, Flanker Task, 2-back Task | American football, Basketball, Canoe slalom, Handball, | Archery, Athletics, Cross-country skiing, | Elite athletes                                                                                                      | - Sig. main effect of group on cognitive flexibility ( $F(3, 70) = 2.55$ , $p = .03$ ) and working memory ( $F(3, 70) = 3.05$ , $p = .02$ ); OSE > CSE                                                                           |

|                                 |                                                          |                                                             |           |                              |                        |                                                     |                                                                                      |                                                                                                                                                                                                                   |
|---------------------------------|----------------------------------------------------------|-------------------------------------------------------------|-----------|------------------------------|------------------------|-----------------------------------------------------|--------------------------------------------------------------------------------------|-------------------------------------------------------------------------------------------------------------------------------------------------------------------------------------------------------------------|
|                                 |                                                          |                                                             |           |                              | Olympic sailing        | Marathon, Shooting, Swimming, Track-bike, Triathlon |                                                                                      |                                                                                                                                                                                                                   |
| <b>Li et al. [57]</b>           | <i>N</i> = 75<br>25 (10/15)<br>25 (17/8)<br>25 (21/4)    | 69.04 (3.4)<br>69.80 (3.1)<br>67.80 (2.9)<br>(Older Adults) | IC,<br>CF | Stroop Task, Task-switching  | Table tennis, tennis   | Running, Brisk walking                              | No differences in physical activity in exercise groups                               | - Sig. effect of group on inhibition control ( $F(2,66) = 4.60, p = .013$ ) and global switch costs in task switching ( $F(2,24) = 7.03, p = .004$ )<br>- No reported difference between OSE and CSE              |
| <b>Nakamoto &amp; Mori [50]</b> | <i>N</i> = 18<br>9 (--/9)<br>9 (--/9)                    | --                                                          | IC        | Go/NoGo Task                 | Baseball               | Athletics, Gymnastics                               | OSE group spent 25 h/week for baseball training, no data for CSE group               | - No significant group difference ( $t(16)=1.65, p < .05$ ) for simple reaction time<br>- Sig. group differences for Spatial-BB, Spatial-Mix and color condition ( $p < .01$ )                                    |
| <b>Tsai &amp; Wang [22]</b>     | <i>N</i> = 64<br>21 (7/14)<br>22 (8/14)<br>21 (8/13)     | 65.35 (4.2)<br>66.03 (4.1)<br>63.94 (3.4)<br>(Older Adults) | CF        | Task switching               | Badminton, Tabletennis | Running, Swimming                                   | No differences in training (3 x 30 min/week) and training years (2 years)            | - OSE responded faster in switch condition than CSE<br>- sig. main effect of group on specific RT switch costs ( $F[2,61] = 7.30, p = .001$ )<br>-                                                                |
| <b>Wang &amp; Guo [42]</b>      | <i>N</i> = 259<br>85 (45/40)<br>87 (49/38)<br>87 (46/41) | 66.8 (5.5)<br>65.5 (5.8)<br>65.9 (6.3)<br>(Older Adults)    | IC        | Attention network test (ANT) | Badminton, Tennis      | Running, Swimming                                   | No differences in training (3 x 30 min/week) and training years (1 year)             | - OSE significantly higher executive network efficiency than CSE ( $p < .01$ )<br>- No differences for alerting and orienting networks ( $p > .05$ ) and for proportion scores of alerting and orienting networks |
| <b>Wang et al. [26]</b>         | <i>N</i> = 60<br>20 (-/20)<br>20 (-/20)<br>20 (-/20)     | 20.70 (2.4)<br>19.31 (0.8)<br>20.40 (2.1)                   | IC        | Stop-signal task             | Tennis                 | Swimming                                            | No sig. differences [ $t(39)=.89, p=.381, d=0.28$ ] in years of training between OSE | - OSE had shorter stop-signal reaction times than CSE ( $t(39) = 3.76, p = .001$ )                                                                                                                                |

|                              |                                                |                                                    |    |                                   |            |                        |                                                                                      |                                                                                                                                                                        |
|------------------------------|------------------------------------------------|----------------------------------------------------|----|-----------------------------------|------------|------------------------|--------------------------------------------------------------------------------------|------------------------------------------------------------------------------------------------------------------------------------------------------------------------|
|                              |                                                | (Adolescents/Adults)                               |    |                                   |            |                        | (5.50 ± 2.80) and CSE (4.85 ± 1.64)                                                  | - no differences on RTs between OSE and CSE<br>- No significant differences among groups on inhibition function ( $F(2, 57) = .02$ , $p = .981$ , $\eta_p^2 = .00$ )   |
| <b>Yamashiro et al. [52]</b> | $N = 24$<br>12 (-/12)<br>12 (-/12)<br>--       | 21.2 (0.8)<br>22.7 (3.4)<br>--<br>(Adults)         | IC | Go/Nogo paradigm                  | Basketball | Athletics,<br>Swimming | No differences                                                                       | - Go/Nogo RT shorter for OSE than CSE ( $p = .07$ ).                                                                                                                   |
| <b>Yu et al. [43]</b>        | $N = 54$<br>18 (8/10)<br>18 (7/11)<br>18 (9/9) | 21.1 (2.2)<br>21.1 (2.2)<br>21.8 (2.1)<br>(Adults) | CF | Cued task-switching paradigm task | Badminton  | Athletics              | No differences in years of training levels of skill competencies between OSE and CSE | - sig. fewer switch costs in OSE than CSE in 100% validity condition ( $p = .023$ )<br>- No significant differences in switch costs between OSE and CSE ( $p = .473$ ) |

Note: EFs = Executive Functions, OSE = Open-Skill-Exercise, CSE = Closed-Skill-Exercise, WM = Working-Memory, IC = Inhibition Control, CF = Cognitive Flexibility, RT = reaction time, ACC = accuracy
